# Supplementary material
Source: Springer Nature journal article supplement (https://www.springermedizin.de/resource/supplementary/12888_2009_704_MOESM6_ESM.pdf/9478212)

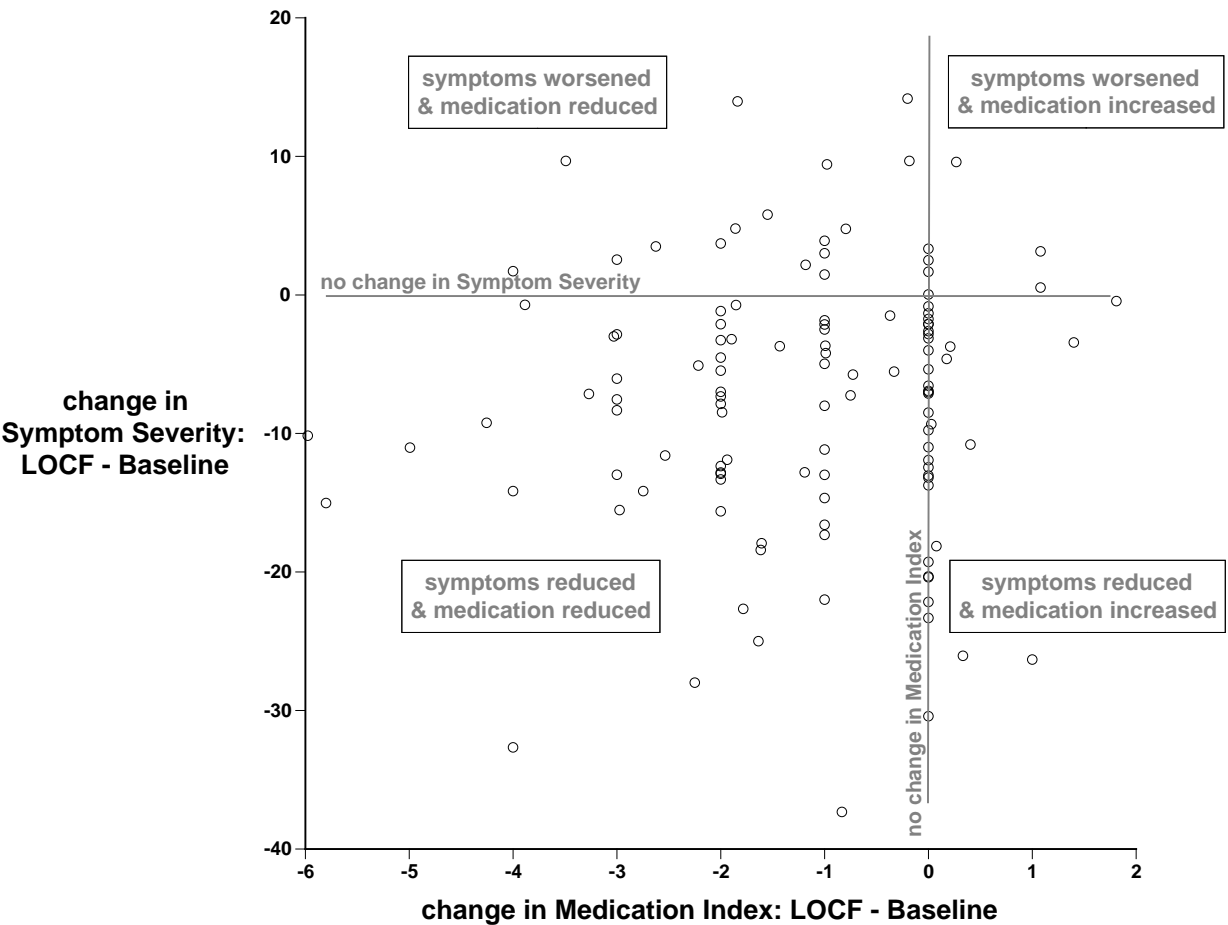

Supplement: MOESM6 [file 9478212]
